# Supplementary material for: Chromosome and Genome Divergence between the Cryptic Eurasian Malaria Vector-Species Anopheles messeae and Anopheles daciae
Source: PubMed Central journal article supplement (PMC7074279; doi:10.3390/genes11020165), 2020-02-05
Supplement: genes-11-00165-s001.pdf [file genes-11-00165-s001.pdf]

**Supplementary table S1. ITS2 genotypes and inversion karyotypes in three populations of *An. messeae* in Moscow region.** Letters in sample numbers indicate region (M – Moscow) and location (E – Yegoryevsk, N – Novokosino, No – Noginsk). The presence of double picks in ITS2 sequences is indicated by the IUPAC nucleotide ambiguity code: M – A and C, W – A and T, Y – T and C, R – A and G, S – C and G. Small letters indicate manually assigning base. X, 2R, 3R and 3L stand for chromosomal arms. Numbers in karyotypes represent standard (0) or inverted (1, 4) arrangements. Males can be recognized by a single arrangement number in X chromosome karyotype that corresponds to one homolog of this chromosome in males.

| Sample number | Accession number | Species            | SNP |     |     |     |     |     | Karyotype |    |    |    |
|---------------|------------------|--------------------|-----|-----|-----|-----|-----|-----|-----------|----|----|----|
|               |                  |                    | 150 | 211 | 215 | 217 | 412 | 432 | X         | 2R | 3R | 3L |
| MN1           | MG808170         | <i>An. messeae</i> | M   | T   | T   | C   | G   | G   | 1         | 00 | 01 | 00 |
| MN2           | MG808171         | <i>An. messeae</i> | M   | T   | T   | C   | G   | G   | 11        | 01 | 01 | 00 |
| MN3           | MG808172         | <i>An. messeae</i> | M   | T   | T   | C   | G   | G   | 11        | 01 | 00 | 00 |
| MN4           | MG808173         | <i>An. daciae</i>  | C   | W   | W   | Y   | A   | C   | 01        | 00 | 01 | 00 |
| MN5           | MG808174         | <i>An. daciae</i>  | C   | W   | W   | T   | A   | C   | 11        | 00 | 00 | 00 |
| MN6           | MG808175         | <i>An. messeae</i> | M   | T   | T   | C   | G   | G   | 1         | 01 | 01 | 00 |
| MN7           | MG808176         | <i>An. messeae</i> | M   | T   | T   | C   | G   | G   | 1         | 01 | 00 | 00 |
| MN8           | MG808177         | <i>An. messeae</i> | M   | T   | T   | C   | G   | G   | 14        | 00 | 01 | 01 |
| MN9           | MG808178         | <i>An. messeae</i> | M   | T   | T   | C   | G   | G   | 14        | 00 | 00 | 00 |
| MN10          | MG808179         | <i>An. messeae</i> | M   | T   | T   | C   | G   | G   | 11        | 00 | 00 | 00 |
| MN11          | MG808180         | <i>An. messeae</i> | M   | T   | T   | C   | G   | G   | 11        | 00 | 01 | 00 |
| MN12          | MG808181         | <i>An. messeae</i> | M   | T   | T   | C   | G   | G   | 1         | 00 | 00 | 00 |
| MN13          | MG808182         | <i>An. messeae</i> | M   | T   | T   | C   | G   | G   | 11        | 00 | 11 | 00 |
| MN14          | MG808183         | <i>An. messeae</i> | M   | T   | T   | C   | G   | G   | 11        | 00 | 01 | 01 |
| MN15          | MG808184         | <i>An. messeae</i> | M   | T   | T   | C   | G   | G   | 11        | 11 | 00 | 00 |
| MN16          | MG808185         | <i>An. messeae</i> | M   | T   | T   | C   | G   | G   | 11        | 11 | 01 | 00 |
| MN17          | MG808186         | <i>An. daciae</i>  | C   | W   | W   | Y   | A   | C   | 0         | 00 | 00 | 00 |
| MN19          | MG808187         | <i>An. messeae</i> | M   | T   | T   | C   | G   | G   | 11        | 00 | 00 | 00 |
| MN20          | MG808188         | <i>An. messeae</i> | M   | T   | T   | C   | G   | G   | 1         | 00 | 00 | 00 |
| MN21          | MG808189         | <i>An. messeae</i> | M   | T   | T   | C   | G   | G   | 11        | 11 | 01 | 00 |
| MN22          | MG808190         | <i>An. daciae</i>  | C   | W   | W   | Y   | A   | C   | 01        | 00 | 01 | 00 |
| MN23          | MG808191         | <i>An. messeae</i> | M   | T   | T   | C   | G   | G   | 11        | 01 | 00 | 00 |
| MN24          | MG808192         | <i>An. messeae</i> | M   | T   | T   | C   | G   | G   | 1         | 00 | 01 | 00 |
| MN25          | MG808193         | <i>An. daciae</i>  | C   | W   | W   | Y   | A   | C   | 00        | 00 | 00 | 00 |
| MN26          | MG808194         | <i>An. messeae</i> | M   | T   | T   | C   | G   | G   | 11        | 11 | 01 | 00 |
| MN27          | MG808195         | <i>An. messeae</i> | M   | T   | T   | C   | G   | G   | 11        | 00 | 01 | 00 |
| MN28          | MG808196         | <i>An. messeae</i> | M   | T   | T   | C   | G   | G   | 11        | 01 | 00 | 00 |
| MN29          | MG808197         | <i>An. messeae</i> | M   | T   | T   | C   | G   | G   | 1         | 00 | 01 | 00 |
| MN30          | MG808198         | <i>An. messeae</i> | m   | T   | T   | C   | G   | G   | 11        | 01 | 01 | 00 |
| MN31          | MG808199         | <i>An. messeae</i> | M   | T   | T   | C   | G   | G   | 11        | 00 | 01 | 00 |
| MN32          | MG808200         | <i>An. messeae</i> | M   | T   | T   | C   | G   | G   | 1         | 01 | 01 | 00 |

|      |          |                    |   |   |   |   |   |   |    |    |    |    |
|------|----------|--------------------|---|---|---|---|---|---|----|----|----|----|
| MN33 | MG808201 | <i>An. messeae</i> | M | T | T | C | G | G | 1  | 00 | 00 | 00 |
| MN34 | MG808202 | <i>An. messeae</i> | M | T | T | C | G | G | 11 | 00 | 00 | 00 |
| MN35 | MG808203 | <i>An. daciae</i>  | C | W | W | T | A | C | 01 | 00 | 00 | 00 |
| MN36 | MG808204 | <i>An. messeae</i> | M | T | T | C | G | G | 1  | 00 | 00 | 00 |
| MN37 | MG808205 | <i>An. messeae</i> | M | T | T | C | G | G | 11 | 01 | 00 | 00 |
| MN38 | MG808206 | <i>An. messeae</i> | M | T | T | C | G | G | 11 | 01 | 00 | 00 |
| MN39 | MG808207 | <i>An. messeae</i> | M | T | T | C | G | G | 11 | 01 | 00 | 00 |
| MN40 | MG808208 | <i>An. messeae</i> | M | T | T | C | G | G | 11 | 00 | 00 | 00 |
| MN41 | MG808209 | <i>An. messeae</i> | M | T | T | C | G | G | 11 | 00 | 00 | 00 |
| MN42 | MG808210 | <i>An. messeae</i> | M | T | T | C | G | G | 11 | 00 | 01 | 00 |
| MN43 | MG808211 | <i>An. messeae</i> | M | T | T | C | G | G | 11 | 00 | 01 | 00 |
| MN44 | MG808212 | <i>An. daciae</i>  | C | W | W | Y | A | C | 00 | 00 | 00 | 00 |
| MN45 | MG808213 | <i>An. daciae</i>  | C | W | W | Y | A | C | 1  | 00 | 00 | 00 |
| MN46 | MG808214 | <i>An. messeae</i> | M | T | T | C | G | G | 11 | 01 | 00 | 01 |
| MN47 | MG808215 | <i>An. daciae</i>  | C | W | W | Y | A | C | 1  | 00 | 01 | 00 |
| MN48 | MG808216 | <i>An. messeae</i> | M | T | T | C | G | G | 14 | 00 | 11 | 00 |
| MN49 | MG808217 | <i>An. messeae</i> | M | T | T | C | G | G | 11 | 01 | 00 | 00 |
| MN50 | MG808218 | <i>An. messeae</i> | M | T | T | C | G | G | 11 | 01 | 00 | 00 |
| MN51 | MG808219 | <i>An. daciae</i>  | C | W | W | Y | A | C | 1  | 00 | 00 | 00 |
| MN52 | MG808220 | <i>An. daciae</i>  | C | W | W | Y | A | C | 01 | 00 | 00 | 00 |
| MN53 | MG808221 | <i>An. messeae</i> | M | T | T | C | G | G | 11 | 01 | 00 | 00 |
| MN54 | MG808222 | <i>An. messeae</i> | M | T | T | C | G | G | 1  | 00 | 11 | 00 |
| MN55 | MG808223 | <i>An. messeae</i> | M | T | T | C | G | G | 1  | 01 | 00 | 01 |
| MN56 | MG808224 | <i>An. messeae</i> | M | T | T | C | G | G | 1  | 01 | 00 | 00 |
| MN57 | MG808225 | <i>An. messeae</i> | M | T | T | C | G | G | 11 | 01 | 00 | 00 |
| MN58 | MG808226 | <i>An. daciae</i>  | C | W | W | Y | A | C | 0  | 00 | 00 | 00 |
| MN59 | MG808227 | <i>An. messeae</i> | m | T | T | C | G | G | 11 | 00 | 01 | 00 |
| MN60 | MG808228 | <i>An. messeae</i> | M | T | T | C | G | G | 11 | 00 | 00 | 00 |
| MN61 | MG808229 | <i>An. messeae</i> | M | T | T | C | G | G | 1  | 01 | 00 | 00 |
| MN62 | MG808230 | <i>An. daciae</i>  | C | W | W | Y | A | C | 0  | 00 | 00 | 00 |
| MN63 | MG808231 | <i>An. messeae</i> | M | T | T | C | G | G | 11 | 00 | 00 | 00 |
| MN64 | MG808232 | <i>An. messeae</i> | M | T | T | C | G | G | 14 | 11 | 01 | 00 |
| MN65 | MG808233 | <i>An. messeae</i> | M | T | T | C | G | G | 11 | 00 | 01 | 00 |
| MN66 | MG808234 | <i>An. daciae</i>  | C | W | W | Y | A | C | 01 | 00 | 00 | 00 |
| MN67 | MG808235 | <i>An. messeae</i> | m | T | T | C | G | G | 11 | 00 | 11 | 00 |
| MN68 | MG808236 | <i>An. daciae</i>  | C | W | W | Y | A | C | 11 | 00 | 00 | 00 |
| MN69 | MG808237 | <i>An. daciae</i>  | c | W | W | y | A | C | 0  | 00 | 00 | 00 |
| MN70 | MG808238 | <i>An. messeae</i> | M | T | T | C | G | G | 11 | 01 | 01 | 00 |
| MN71 | MG808239 | <i>An. daciae</i>  | C | W | W | y | A | C | 01 | 00 | 00 | 00 |
| MN72 | MG808240 | <i>An. messeae</i> | M | T | T | C | G | G | 11 | 00 | 00 | 00 |
| MN73 | MG808241 | <i>An. messeae</i> | M | T | T | C | G | G | 1  | 11 | 00 | 00 |
| MN74 | MG808242 | <i>An. messeae</i> | M | T | T | C | G | G | 11 | 00 | 00 | 00 |

|       |          |                    |   |   |   |   |   |   |    |    |    |    |
|-------|----------|--------------------|---|---|---|---|---|---|----|----|----|----|
| MN75  | MG808243 | <i>An. daciae</i>  | C | W | W | Y | A | C | 0  | 00 | 00 | 00 |
| MN76  | MG808244 | <i>An. daciae</i>  | C | W | W | Y | A | C | 01 | 00 | 00 | 00 |
| MN77  | MG808245 | <i>An. messeae</i> | M | T | T | C | G | G | 14 | 00 | 01 | 00 |
| MN78  | MG808246 | <i>An. messeae</i> | M | T | T | C | G | G | 11 | 01 | 00 | 00 |
| MN79  | MG808247 | <i>An. daciae</i>  | C | W | W | Y | A | C | 00 | 00 | 00 | 00 |
| MN80  | MG808248 | <i>An. daciae</i>  | C | W | W | Y | A | C | 1  | 00 | 00 | 00 |
| MN81  | MG808249 | <i>An. daciae</i>  | C | W | W | Y | A | C | 00 | 00 | 00 | 00 |
| MN82  | MG808250 | <i>An. messeae</i> | M | T | T | C | G | G | 1  | 00 | 00 | 00 |
| MN83  | MG808251 | <i>An. messeae</i> | M | T | t | C | G | G | 11 | 00 | 00 | 00 |
| MN84  | MG808252 | <i>An. daciae</i>  | C | W | W | Y | A | C | 01 | 00 | 00 | 00 |
| MN85  | MG808253 | <i>An. messeae</i> | m | T | T | C | G | G | 1  | 01 | 00 | 00 |
| MN86  | MG808254 | <i>An. daciae</i>  | C | W | W | Y | A | C | 11 | 00 | 01 | 00 |
| MN87  | MG808255 | <i>An. messeae</i> | M | T | T | C | G | G | 1  | 01 | 01 | 00 |
| MN88  | MG808256 | <i>An. messeae</i> | M | T | T | C | G | G | 11 | 00 | 00 | 00 |
| MN89  | MG808257 | <i>An. messeae</i> | M | T | T | C | G | G | 11 | 01 | 01 | 00 |
| MN90  | MG808258 | <i>An. messeae</i> | M | T | T | C | G | G | 11 | 11 | 01 | 00 |
| MN91  | MG808259 | <i>An. messeae</i> | M | T | T | C | G | G | 1  | 11 | 11 | 00 |
| MN92  | MG808260 | <i>An. messeae</i> | M | T | T | C | G | G | 14 | 00 | 01 | 00 |
| MN93  | MG808261 | <i>An. daciae</i>  | C | W | W | Y | A | C | 00 | 00 | 00 | 00 |
| MN94  | MG808262 | <i>An. messeae</i> | M | T | T | C | G | G | 1  | 01 | 01 | 00 |
| MN95  | MG808263 | <i>An. messeae</i> | M | T | T | C | G | G | 14 | 11 | 00 | 00 |
| MN96  | MG808264 | <i>An. messeae</i> | M | T | T | C | G | G | 1  | 11 | 01 | 00 |
| MN97  | MG808265 | <i>An. messeae</i> | M | T | T | C | G | G | 14 | 00 | 01 | 00 |
| MN98  | MG808266 | <i>An. messeae</i> | M | T | T | C | G | G | 11 | 00 | 11 | 00 |
| MN99  | MG808267 | <i>An. daciae</i>  | C | W | W | Y | A | C | 1  | 00 | 00 | 00 |
| MN100 | MG808268 | <i>An. messeae</i> | M | T | T | C | G | G | 11 | 00 | 11 | 00 |
| MNo1  | MG686138 | <i>An. messeae</i> | M | T | T | C | G | G | 1  | 11 | 00 | 00 |
| MNo2  | MG686139 | <i>An. messeae</i> | m | T | T | C | G | G | 11 | 00 | 01 | 00 |
| MNo3  | MG686140 | <i>An. messeae</i> | m | T | T | C | G | G | 11 | 01 | 00 | 01 |
| MNo4  | MG686141 | <i>An. messeae</i> | M | T | T | C | G | G | 1  | 00 | 00 | 00 |
| MNo5  | MG686142 | <i>An. messeae</i> | M | T | T | C | G | G | 11 | 00 | 01 | 00 |
| MNo6  | MG686143 | <i>An. messeae</i> | M | T | T | C | G | G | 1  | 01 | 01 | 00 |
| MNo7  | MG686144 | <i>An. daciae</i>  | C | W | W | Y | A | C | 0  | 00 | 01 | 00 |
| MNo8  | MG686145 | <i>An. daciae</i>  | C | W | W | Y | A | C | 00 | 00 | 00 | 00 |
| MNo9  | MG686146 | <i>An. messeae</i> | M | T | T | C | G | G | 11 | 01 | 01 | 00 |
| MNo10 | MG686147 | <i>An. messeae</i> | M | T | T | C | G | G | 11 | 01 | 01 | 00 |
| MNo11 | MG686148 | <i>An. messeae</i> | M | T | T | C | G | G | 1  | 11 | 00 | 00 |
| MNo12 | MG686149 | <i>An. messeae</i> | M | T | T | C | G | G | 4  | 11 | 00 | 00 |
| MNo13 | MG686150 | <i>An. messeae</i> | M | T | T | C | G | G | 1  | 01 | 01 | 00 |
| MNo14 | MG686151 | <i>An. messeae</i> | M | T | T | C | G | G | 11 | 01 | 11 | 00 |
| MNo15 | MG686152 | <i>An. messeae</i> | M | T | T | C | G | G | 11 | 11 | 00 | 01 |
| MNo16 | MG686153 | <i>An. messeae</i> | M | T | T | C | G | G | 1  | 00 | 01 | 00 |

|       |          |                    |   |   |   |   |   |   |    |    |    |    |
|-------|----------|--------------------|---|---|---|---|---|---|----|----|----|----|
| MNo17 | MG686154 | <i>An. messeae</i> | M | T | T | C | G | G | 1  | 11 | 00 | 00 |
| MNo18 | MG686155 | <i>An. messeae</i> | m | T | T | C | G | G | 14 | 00 | 00 | 00 |
| MNo19 | MG686156 | <i>An. daciae</i>  | C | W | W | Y | A | C | 11 | 00 | 00 | 00 |
| MNo20 | MG686157 | <i>An. messeae</i> | m | T | T | C | G | G | 11 | 11 | 01 | 00 |
| MNo21 | MG686158 | <i>An. daciae</i>  | C | W | W | Y | A | C | 11 | 00 | 00 | 00 |
| MNo22 | MG686159 | <i>An. messeae</i> | M | T | T | C | G | G | 11 | 11 | 00 | 00 |
| MNo23 | MG686160 | <i>An. daciae</i>  | C | W | W | Y | A | C | 00 | 00 | 00 | 00 |
| MNo24 | MG686161 | <i>An. messeae</i> | M | T | T | C | G | G | 11 | 01 | 00 | 00 |
| MNo25 | MG686162 | <i>An. messeae</i> | M | T | T | C | G | G | 1  | 00 | 01 | 00 |
| MNo26 | MG686163 | <i>An. daciae</i>  | C | W | W | Y | A | C | 00 | 00 | 00 | 00 |
| MNo27 | MG686164 | <i>An. messeae</i> | M | T | T | C | G | G | 11 | 01 | 01 | 01 |
| MNo28 | MG686165 | <i>An. messeae</i> | M | T | T | C | G | G | 1  | 01 | 01 | 00 |
| MNo29 | MG686166 | <i>An. daciae</i>  | C | W | W | Y | A | C | 00 | 00 | 00 | 00 |
| MNo30 | MG686167 | <i>An. messeae</i> | M | T | T | C | G | G | 1  | 11 | 00 | 00 |
| MNo31 | MG686168 | <i>An. messeae</i> | M | T | T | C | G | G | 11 | 00 | 00 | 00 |
| MNo32 | MG686169 | <i>An. messeae</i> | M | T | T | C | G | G | 11 | 01 | 01 | 00 |
| MNo33 | MG686170 | <i>An. daciae</i>  | C | W | W | Y | A | C | 11 | 00 | 00 | 00 |
| MNo34 | MG686171 | <i>An. daciae</i>  | C | W | W | Y | A | C | 1  | 00 | 00 | 00 |
| MNo35 | MG686172 | <i>An. messeae</i> | M | T | T | C | G | G | 1  | 00 | 11 | 00 |
| MNo36 | MG686173 | <i>An. daciae</i>  | C | W | W | Y | A | C | 01 | 00 | 00 | 00 |
| MNo37 | MG686174 | <i>An. messeae</i> | M | T | T | C | G | G | 1  | 00 | 00 | 00 |
| MNo38 | MG686175 | <i>An. messeae</i> | M | T | T | C | G | G | 1  | 11 | 00 | 00 |
| MNo39 | MG686176 | <i>An. daciae</i>  | C | W | W | Y | A | C | 01 | 00 | 01 | 00 |
| MNo40 | MG686177 | <i>An. messeae</i> | m | T | T | C | G | G | 11 | 01 | 00 | 00 |
| MNo41 | MG686178 | <i>An. daciae</i>  | C | W | W | Y | A | C | 01 | 00 | 00 | 00 |
| MNo42 | MG686179 | <i>An. messeae</i> | M | T | T | C | G | G | 11 | 11 | 00 | 00 |
| MNo44 | MG686181 | <i>An. messeae</i> | M | T | T | C | G | G | 11 | 01 | 01 | 00 |
| MNo45 | MG686182 | <i>An. messeae</i> | M | T | T | C | G | G | 1  | 01 | 01 | 00 |
| MNo46 | MG686183 | <i>An. messeae</i> | M | T | T | C | G | G | 1  | 00 | 01 | 00 |
| MNo47 | MG686184 | <i>An. daciae</i>  | C | W | W | Y | A | C | 00 | 00 | 00 | 00 |
| MNo48 | MG686185 | <i>An. messeae</i> | M | T | T | C | G | G | 1  | 00 | 01 | 00 |
| MNo49 | MG686186 | <i>An. messeae</i> | M | T | T | C | G | G | 11 | 01 | 00 | 00 |
| MNo50 | MG686187 | <i>An. daciae</i>  | C | W | W | Y | A | C | 01 | 00 | 00 | 00 |
| MNo51 | MG686188 | <i>An. daciae</i>  | C | W | W | Y | A | C | 0  | 00 | 00 | 00 |
| MNo52 | MG686189 | <i>An. daciae</i>  | C | W | W | Y | A | C | 0  | 00 | 01 | 00 |
| MNo53 | MG686190 | <i>An. daciae</i>  | C | W | W | Y | A | C | 1  | 00 | 00 | 00 |
| MNo54 | MG686191 | <i>An. daciae</i>  | C | W | W | Y | A | C | 0  | 00 | 01 | 00 |
| MNo55 | MG686192 | <i>An. messeae</i> | M | T | T | C | G | G | 11 | 00 | 00 | 01 |
| MNo56 | MG686193 | <i>An. messeae</i> | M | T | T | C | G | G | 1  | 00 | 01 | 00 |
| MNo57 | MG686194 | <i>An. messeae</i> | M | T | T | C | G | G | 1  | 11 | 01 | 00 |
| MNo58 | MG686195 | <i>An. daciae</i>  | C | W | W | Y | A | C | 00 | 00 | 00 | 00 |
| MNo60 | MG686196 | <i>An. messeae</i> | M | T | T | C | G | G | 1  | 01 | 00 | 00 |

|        |          |                    |   |   |   |   |   |   |    |    |    |    |
|--------|----------|--------------------|---|---|---|---|---|---|----|----|----|----|
| MNo61  | MG686197 | <i>An. messeae</i> | M | T | T | C | G | G | 1  | 01 | 01 | 00 |
| MNo62  | MG686198 | <i>An. messeae</i> | M | T | T | C | G | G | 11 | 00 | 00 | 00 |
| MNo64  | MG686200 | <i>An. messeae</i> | M | T | T | C | G | G | 14 | 00 | 00 | 00 |
| MNo65  | MG686201 | <i>An. messeae</i> | M | T | T | C | G | G | 1  | 01 | 00 | 00 |
| MNo66  | MG686202 | <i>An. messeae</i> | M | T | T | C | G | G | 1  | 11 | 01 | 00 |
| MNo67  | MG686203 | <i>An. daciae</i>  | C | W | W | Y | A | C | 01 | 00 | 00 | 00 |
| MNo68  | MG686204 | <i>An. daciae</i>  | C | W | W | Y | A | C | 1  | 00 | 00 | 00 |
| MNo69  | MG686205 | <i>An. messeae</i> | M | T | T | C | G | G | 1  | 01 | 11 | 00 |
| MNo71  | MG686206 | <i>An. messeae</i> | M | T | T | C | G | G | 11 | 00 | 01 | 00 |
| MNo72  | MG686207 | <i>An. messeae</i> | M | T | T | C | G | G | 11 | 01 | 01 | 00 |
| MNo73  | MG686208 | <i>An. messeae</i> | M | T | T | C | G | G | 11 | 00 | 00 | 01 |
| MNo74  | MG686209 | <i>An. messeae</i> | M | T | T | C | G | G | 1  | 00 | 01 | 00 |
| MNo76  | MG686210 | <i>An. messeae</i> | M | T | T | C | G | G | 1  | 00 | 00 | 00 |
| MNo77  | MG686211 | <i>An. messeae</i> | M | T | T | C | G | G | 11 | 01 | 00 | 00 |
| MNo78  | MG686212 | <i>An. daciae</i>  | C | W | W | Y | A | C | 01 | 00 | 00 | 00 |
| MNo79  | MG686213 | <i>An. daciae</i>  | C | W | W | Y | A | C | 00 | 00 | 00 | 00 |
| MNo80  | MG686214 | <i>An. messeae</i> | M | T | T | C | G | G | 11 | 01 | 00 | 00 |
| MNo81  | MG686215 | <i>An. messeae</i> | M | T | T | C | G | G | 11 | 00 | 01 | 00 |
| MNo82  | MG686216 | <i>An. daciae</i>  | C | W | W | Y | A | C | 1  | 00 | 00 | 00 |
| MNo83  | MG686217 | <i>An. messeae</i> | M | T | T | C | G | G | 11 | 00 | 01 | 00 |
| MNo84  | MG686218 | <i>An. daciae</i>  | C | W | W | Y | A | C | 1  | 00 | 00 | 00 |
| MNo85  | MG686219 | <i>An. daciae</i>  | C | W | W | Y | A | C | 1  | 00 | 00 | 00 |
| MNo86  | MG686220 | <i>An. daciae</i>  | C | W | W | Y | A | C | 1  | 01 | 00 | 00 |
| MNo87  | MG686221 | <i>An. messeae</i> | M | T | T | C | G | G | 1  | 00 | 01 | 00 |
| MNo88  | MG686222 | <i>An. daciae</i>  | C | W | W | Y | A | C | 01 | 00 | 00 | 00 |
| MNo89  | MG686223 | <i>An. daciae</i>  | C | W | W | Y | A | C | 1  | 00 | 11 | 00 |
| MNo90  | MG686224 | <i>An. messeae</i> | M | T | T | C | G | G | 11 | 00 | 11 | 00 |
| MNo92  | MG686225 | <i>An. messeae</i> | M | T | T | C | G | G | 11 | 11 | 01 | 01 |
| MNo93  | MG686226 | <i>An. messeae</i> | M | T | T | C | G | G | 1  | 00 | 00 | 00 |
| MNo94  | MG686227 | <i>An. messeae</i> | M | T | T | C | G | G | 11 | 00 | 01 | 01 |
| MNo95  | MG686228 | <i>An. messeae</i> | M | T | T | C | G | G | 11 | 01 | 00 | 00 |
| MNo96  | MG686229 | <i>An. messeae</i> | M | T | T | C | G | G | 1  | 01 | 00 | 00 |
| MNo97  | MG686230 | <i>An. daciae</i>  | C | W | W | Y | A | C | 0  | 00 | 00 | 00 |
| MNo98  | MG686231 | <i>An. messeae</i> | M | T | T | C | G | G | 1  | 01 | 00 | 00 |
| MNo99  | MG686232 | <i>An. daciae</i>  | C | W | W | Y | A | C | 11 | 00 | 00 | 00 |
| MNo100 | MG686233 | <i>An. messeae</i> | M | T | T | C | G | G | 11 | 01 | 01 | 00 |
| ME1    | MG727761 | <i>An. daciae</i>  | M | W | W | Y | A | C | 00 | 00 | 00 | 00 |
| ME2    | MG727762 | <i>An. daciae</i>  | C | W | W | Y | A | C | 0  | 00 | 00 | 00 |
| ME3    | MG727763 | <i>An. messeae</i> | M | T | T | C | G | G | 11 | 11 | 00 | 00 |
| ME4    | MG727764 | <i>An. daciae</i>  | C | W | W | Y | A | C | 11 | 00 | 00 | 00 |
| ME6    | MG727765 | <i>An. daciae</i>  | M | W | W | Y | A | C | 11 | 00 | 00 | 00 |
| ME7    | MG727766 | <i>An. daciae</i>  | C | W | W | Y | A | C | 0  | 00 | 00 | 00 |

|      |          |                    |   |   |   |   |   |   |    |     |    |    |
|------|----------|--------------------|---|---|---|---|---|---|----|-----|----|----|
| ME10 | MG727767 | <i>An. daciae</i>  | C | W | W | Y | A | C | 01 | 00  | 00 | 00 |
| ME11 | MG727768 | <i>An. daciae</i>  | C | W | W | Y | A | C | 01 | 00  | 00 | 00 |
| ME12 | MG727769 | <i>An. daciae</i>  | C | W | W | Y | A | C | 01 | 00  | 00 | 00 |
| ME13 | MG727770 | <i>An. messeae</i> | M | T | T | C | G | G | 11 | 01  | 01 | 00 |
| ME14 | MG727771 | <i>An. messeae</i> | M | T | T | C | G | G | 1  | 01  | 00 | 01 |
| ME15 | MG727772 | <i>An. daciae</i>  | C | W | W | Y | A | C | 01 | 00  | 00 | 00 |
| ME16 | MG727773 | <i>An. messeae</i> | M | T | T | C | G | G | 11 | 00  | 11 | 00 |
| ME17 | MG727774 | <i>An. daciae</i>  | C | W | W | Y | A | C | 01 | 00  | 00 | 00 |
| ME18 | MG727775 | <i>An. messeae</i> | M | T | T | C | G | G | 11 | 00  | 00 | 00 |
| ME19 | MG727776 | <i>An. daciae</i>  | C | W | W | Y | A | C | 00 | 00  | 00 | 00 |
| ME20 | MG727777 | <i>An. messeae</i> | M | T | T | C | G | G | 11 | 00  | 00 | 01 |
| ME21 | MG727778 | Hybrid             | M | W | W | Y | R | S | 04 | 00  | 00 | 00 |
| ME22 | MG727779 | <i>An. daciae</i>  | C | W | W | Y | A | C | 01 | 00  | 00 | 00 |
| ME23 | MG727780 | <i>An. daciae</i>  | C | W | W | Y | A | C | 1  | 00  | 00 | 00 |
| ME24 | MG727781 | <i>An. messeae</i> | M | T | T | C | G | G | 11 | 01  | 01 | 00 |
| ME25 | MG727782 | <i>An. messeae</i> | M | T | T | C | G | G | 4  | 00  | 00 | 00 |
| ME26 | MG727783 | <i>An. messeae</i> | M | T | T | C | G | G | 11 | 00  | 00 | 00 |
| ME27 | MG727784 | <i>An. daciae</i>  | C | W | W | Y | A | C | 0  | 00  | 00 | 00 |
| ME28 | MG727785 | <i>An. daciae</i>  | C | W | W | Y | A | C | 0  | 00  | 00 | 00 |
| ME29 | MG727786 | <i>An. messeae</i> | M | T | T | C | G | G | 1  | 00  | 01 | 01 |
| ME30 | MG727787 | <i>An. daciae</i>  | C | W | W | Y | A | C | 1  | 00  | 00 | 00 |
| ME32 | MG727788 | <i>An. daciae</i>  | C | W | W | Y | A | C | 1  | 00  | 00 | 00 |
| ME33 | MG727789 | <i>An. daciae</i>  | C | W | W | Y | A | C | 01 | 00  | 00 | 00 |
| ME34 | MG727790 | <i>An. daciae</i>  | C | W | W | Y | A | C | 00 | 00  | 00 | 00 |
| ME36 | MG727791 | <i>An. daciae</i>  | C | W | W | Y | A | C | 1  | 00  | 00 | 00 |
| ME37 | MG727792 | <i>An. daciae</i>  | C | W | W | Y | A | C | 1  | 00  | 00 | 00 |
| ME38 | MG727793 | <i>An. daciae</i>  | C | W | W | Y | A | C | 0  | 00  | 00 | 00 |
| ME39 | MG727794 | <i>An. daciae</i>  | C | W | W | Y | A | C | 1  | 00  | 00 | 00 |
| ME40 | MG727795 | <i>An. daciae</i>  | C | W | W | Y | A | C | 1  | 00  | 00 | 00 |
| ME41 | MG727796 | <i>An. daciae</i>  | C | W | W | Y | A | C | 0  | 04* | 00 | 00 |
| ME42 | MG727797 | <i>An. daciae</i>  | C | W | W | Y | A | C | 01 | 00  | 00 | 00 |
| ME43 | MG727798 | <i>An. daciae</i>  | C | W | W | Y | A | C | 01 | 00  | 00 | 00 |
| ME44 | MG727799 | <i>An. daciae</i>  | C | W | W | Y | A | C | 11 | 00  | 00 | 00 |
| ME45 | MG727800 | <i>An. daciae</i>  | C | W | W | y | A | C | 1  | 00  | 00 | 00 |
| ME46 | MG727801 | <i>An. messeae</i> | M | T | T | C | G | G | 1  | 00  | 00 | 01 |
| ME47 | MG727802 | <i>An. daciae</i>  | C | W | W | Y | A | C | 0  | 00  | 00 | 00 |
| ME49 | MG727803 | <i>An. daciae</i>  | C | W | W | Y | A | C | 00 | 00  | 00 | 00 |
| ME50 | MG727804 | <i>An. daciae</i>  | C | W | W | Y | A | C | 11 | 00  | 00 | 00 |
| ME51 | MG727805 | <i>An. daciae</i>  | C | W | W | Y | A | C | 01 | 00  | 00 | 00 |
| ME52 | MG727806 | <i>An. daciae</i>  | C | W | W | Y | A | C | 1  | 00  | 00 | 00 |
| ME53 | MG727807 | <i>An. daciae</i>  | C | W | W | Y | A | C | 0  | 00  | 01 | 00 |
| ME55 | MG727808 | <i>An. daciae</i>  | C | W | W | Y | A | C | 0  | 00  | 01 | 00 |

|       |          |                    |   |   |   |   |   |   |    |    |    |    |
|-------|----------|--------------------|---|---|---|---|---|---|----|----|----|----|
| ME56  | MG727809 | <i>An. daciae</i>  | C | W | W | Y | A | C | 1  | 00 | 00 | 00 |
| ME57  | MG727810 | <i>An. daciae</i>  | C | W | W | Y | A | C | 01 | 00 | 00 | 00 |
| ME58  | MG727811 | <i>An. daciae</i>  | C | W | W | Y | A | C | 11 | 01 | 00 | 00 |
| ME61  | MG727812 | <i>An. messeae</i> | M | T | T | C | G | G | 1  | 00 | 00 | 00 |
| ME62  | MG727813 | <i>An. messeae</i> | M | T | T | C | G | G | 11 | 01 | 00 | 00 |
| ME63  | MG727814 | <i>An. daciae</i>  | C | W | W | Y | A | C | 00 | 00 | 00 | 00 |
| ME64  | MG727815 | <i>An. messeae</i> | M | T | T | C | G | G | 11 | 00 | 00 | 00 |
| ME65  | MG727816 | <i>An. messeae</i> | M | T | T | C | G | G | 11 | 01 | 01 | 00 |
| ME66  | MG727817 | <i>An. daciae</i>  | C | W | W | Y | A | C | 1  | 00 | 00 | 00 |
| ME67  | MG727818 | <i>An. daciae</i>  | C | W | W | Y | A | C | 1  | 00 | 00 | 00 |
| ME68  | MG727819 | <i>An. daciae</i>  | C | W | W | Y | A | C | 00 | 00 | 00 | 00 |
| ME69  | MG727820 | <i>An. messeae</i> | M | T | T | C | G | G | 11 | 01 | 00 | 00 |
| ME71  | MG727821 | <i>An. daciae</i>  | C | W | W | Y | A | C | 01 | 00 | 00 | 00 |
| ME72  | MG727822 | <i>An. daciae</i>  | C | W | W | Y | A | C | 00 | 00 | 00 | 00 |
| ME73  | MG727823 | <i>An. messeae</i> | M | T | T | C | G | G | 1  | 00 | 00 | 00 |
| ME74  | MG727824 | <i>An. daciae</i>  | C | W | W | Y | A | C | 00 | 00 | 00 | 00 |
| ME75  | MG727825 | <i>An. daciae</i>  | C | W | W | Y | A | C | 01 | 00 | 00 | 00 |
| ME76  | MG727826 | <i>An. messeae</i> | M | T | T | C | G | G | 1  | 00 | 00 | 01 |
| ME77  | MG727827 | <i>An. messeae</i> | M | T | T | C | G | G | 11 | 00 | 00 | 00 |
| ME78  | MG727828 | <i>An. daciae</i>  | C | W | W | Y | A | C | 0  | 00 | 01 | 00 |
| ME79  | MG727829 | <i>An. daciae</i>  | C | W | W | Y | A | C | 01 | 00 | 00 | 00 |
| ME80  | MG727830 | <i>An. daciae</i>  | C | W | W | Y | A | C | 1  | 00 | 01 | 00 |
| ME81  | MG727831 | <i>An. daciae</i>  | C | W | W | Y | A | C | 01 | 00 | 00 | 00 |
| ME82  | MG727832 | <i>An. messeae</i> | M | T | T | C | G | G | 1  | 00 | 00 | 00 |
| ME83  | MG727833 | <i>An. messeae</i> | M | T | T | C | G | G | 11 | 00 | 00 | 00 |
| ME84  | MG727834 | <i>An. daciae</i>  | C | W | W | Y | A | C | 0  | 00 | 01 | 00 |
| ME85  | MG727835 | <i>An. daciae</i>  | C | W | W | Y | A | C | 1  | 00 | 00 | 00 |
| ME86  | MG727836 | <i>An. daciae</i>  | C | W | W | Y | A | C | 01 | 00 | 00 | 00 |
| ME88  | MG727837 | <i>An. daciae</i>  | C | W | W | Y | A | C | 1  | 00 | 00 | 00 |
| ME89  | MG727838 | <i>An. daciae</i>  | C | W | W | Y | A | C | 0  | 00 | 00 | 00 |
| ME90  | MG727839 | <i>An. daciae</i>  | C | W | W | y | A | C | 00 | 00 | 00 | 00 |
| ME91  | MG727840 | <i>An. daciae</i>  | C | W | W | Y | A | C | 11 | 00 | 00 | 00 |
| ME92  | MG727841 | <i>An. messeae</i> | M | T | T | C | G | G | 11 | 01 | 01 | 00 |
| ME93  | MG727842 | <i>An. daciae</i>  | C | W | W | Y | A | C | 0  | 00 | 00 | 00 |
| ME96  | MG727843 | <i>An. daciae</i>  | C | W | W | Y | A | C | 01 | 00 | 00 | 00 |
| ME97  | MG727844 | <i>An. messeae</i> | M | T | T | C | G | G | 11 | 00 | 01 | 00 |
| ME98  | MG727845 | <i>An. daciae</i>  | C | W | W | Y | A | C | 0  | 00 | 00 | 00 |
| ME99  | MG727846 | <i>An. messeae</i> | M | T | T | C | G | G | 1  | 00 | 01 | 00 |
| ME100 | MG727847 | <i>An. daciae</i>  | C | W | W | Y | A | C | 01 | 00 | 00 | 00 |

**Supplementary table S2. Numbers of individuals with standard and inverted chromosomal arrangements in three Moscow populations of *An. messeae* and *An. daciae*.** Populations are indicated as following: M – Moscow; E – Yegoryevsk; N – Novokosino; and No – Noginsk. X, 2R, 3R and 3L stand for chromosomal arms. Numbers in karyotype variants represent standard (0) or inverted (1, 4) arrangement.

| Chromosome |         | Numbers of individuals in populations of different species |                   |                    |                   |                    |                   |
|------------|---------|------------------------------------------------------------|-------------------|--------------------|-------------------|--------------------|-------------------|
| Arm        | Variant | MN                                                         |                   | MNo                |                   | ME                 |                   |
|            |         | <i>An. messeae</i>                                         | <i>An. daciae</i> | <i>An. messeae</i> | <i>An. daciae</i> | <i>An. messeae</i> | <i>An. daciae</i> |
| X          | 0 & 00  | 0                                                          | 10                | 0                  | 12                | 0                  | 23                |
|            | 1 & 11  | 65                                                         | 8                 | 60                 | 12                | 23                 | 21                |
|            | 01      | 0                                                          | 8                 | 0                  | 7                 | 0                  | 18                |
|            | 4       | 0                                                          | 0                 | 1                  | 0                 | 1                  | 0                 |
|            | 14      | 8                                                          | 0                 | 2                  | 0                 | 0                  | 0                 |
| 2R         | 0 & 00  | 38                                                         | 26                | 25                 | 30                | 16                 | 60                |
|            | 1 & 11  | 10                                                         | 0                 | 13                 | 0                 | 1                  | 0                 |
|            | 01      | 25                                                         | 0                 | 25                 | 1                 | 7                  | 1                 |
|            | 04      | 0                                                          | 0                 | 0                  | 0                 | 0                  | 1                 |
| 3R         | 0 & 00  | 37                                                         | 22                | 30                 | 26                | 16                 | 57                |
|            | 1 & 11  | 7                                                          | 0                 | 4                  | 1                 | 1                  | 0                 |
|            | 01      | 29                                                         | 4                 | 29                 | 4                 | 7                  | 5                 |
| 3L         | 0 & 00  | 69                                                         | 26                | 56                 | 31                | 19                 | 62                |
|            | 1 & 11  | 0                                                          | 0                 | 0                  | 0                 | 0                  | 0                 |
|            | 01      | 4                                                          | 0                 | 7                  | 0                 | 5                  | 0                 |
